# Supplementary material
Source: ML conference proceedings conference paper supplement (https://openreview.net/forum?id=hayd_QIsu1)
Supplement: supplementary_material [file attachment]

卷之四  
詩經  
卷之五  
詩經  
卷之六  
詩經  
卷之七  
詩經  
卷之八  
詩經  
卷之九  
詩經  
卷之十  
詩經  
卷之十一  
詩經  
卷之十二  
詩經  
卷之十三  
詩經  
卷之十四  
詩經  
卷之十五  
詩經  
卷之十六  
詩經  
卷之十七  
詩經  
卷之十八  
詩經  
卷之十九  
詩經  
卷之二十  
詩經  
卷之二十一  
詩經  
卷之二十二  
詩經  
卷之二十三  
詩經  
卷之二十四  
詩經  
卷之二十五  
詩經  
卷之二十六  
詩經  
卷之二十七  
詩經  
卷之二十八  
詩經  
卷之二十九  
詩經  
卷之三十  
詩經  
卷之三十一  
詩經  
卷之三十二  
詩經  
卷之三十三  
詩經  
卷之三十四  
詩經  
卷之三十五  
詩經  
卷之三十六  
詩經  
卷之三十七  
詩經  
卷之三十八  
詩經  
卷之三十九  
詩經  
卷之四十  
詩經  
卷之四十一  
詩經  
卷之四十二  
詩經  
卷之四十三  
詩經  
卷之四十四  
詩經  
卷之四十五  
詩經  
卷之四十六  
詩經  
卷之四十七  
詩經  
卷之四十八  
詩經  
卷之四十九  
詩經  
卷之五十  
詩經  
卷之五十一  
詩經  
卷之五十二  
詩經  
卷之五十三  
詩經  
卷之五十四  
詩經  
卷之五十五  
詩經  
卷之五十六  
詩經  
卷之五十七  
詩經  
卷之五十八  
詩經  
卷之五十九  
詩經  
卷之六十  
詩經  
卷之六十一  
詩經  
卷之六十二  
詩經  
卷之六十三  
詩經  
卷之六十四  
詩經  
卷之六十五  
詩經  
卷之六十六  
詩經  
卷之六十七  
詩經  
卷之六十八  
詩經  
卷之六十九  
詩經  
卷之七十  
詩經  
卷之七十一  
詩經  
卷之七十二  
詩經  
卷之七十三  
詩經  
卷之七十四  
詩經  
卷之七十五  
詩經  
卷之七十六  
詩經  
卷之七十七  
詩經  
卷之七十八  
詩經  
卷之七十九  
詩經  
卷之八十  
詩經  
卷之八十一  
詩經  
卷之八十二  
詩經  
卷之八十三  
詩經  
卷之八十四  
詩經  
卷之八十五  
詩經  
卷之八十六  
詩經  
卷之八十七  
詩經  
卷之八十八  
詩經  
卷之八十九  
詩經  
卷之九十  
詩經  
卷之九十一  
詩經  
卷之九十二  
詩經  
卷之九十三  
詩經  
卷之九十四  
詩經  
卷之九十五  
詩經  
卷之九十六  
詩經  
卷之九十七  
詩經  
卷之九十八  
詩經  
卷之九十九  
詩經  
卷之一百  
詩經
